# Supplementary material for: From metal nanowires to ultrathin crystalline ALD nanotubes: process development and mechanism revealed by in situ TEM heating experiments
Source: Royal Society of Chemistry journal article supplement (doi:10.1039/d3nr01185b), 2023-01-01

## Supplementary Information

**ESI1:** Overview of the produced copper nanowires by sputtering. a) SEM image of nanowires emerging from a bulk-substrate (W-wire piece). b) STEM image of a nanowire tip and indicated growth direction of [110]. c) Diffraction pattern of a nanowire in [110] zone axis. d) High-resolution STEM image of copper nanowires with native oxide layer.

ESI1: Copper nanowires produced by advanced PVD.

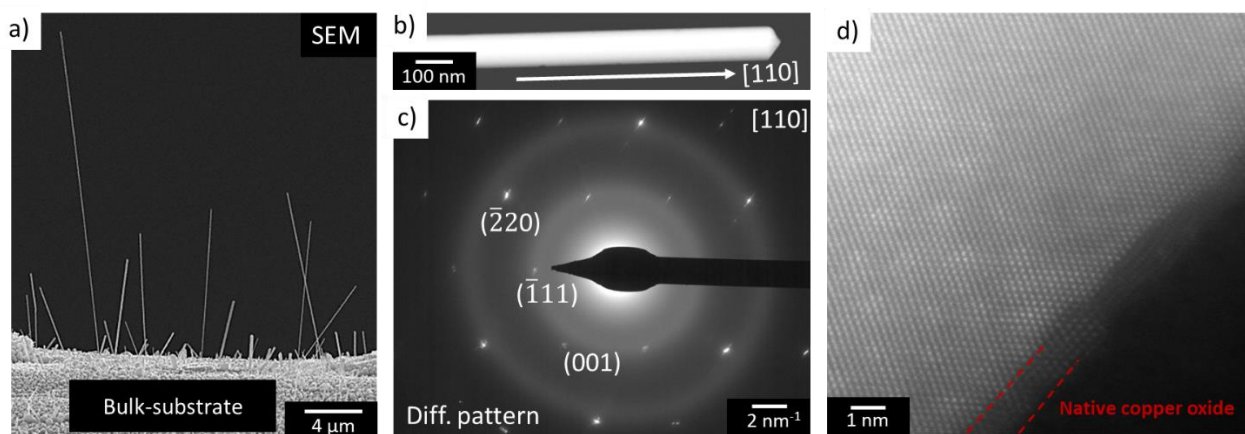

**ESI2:** Effect of oxygen present during annealing. Oxygen present during heating leads to the creation of a diffusive couple at the metal-ALD interface. The Kirkendall effect describes the mutual diffusion of two metals through an interface [1] and is associated with vacancy diffusion and void formation [2]. At the nanoscale, this diffusional phenomenon based on an unequal material flow at the interface of two different solids has been used to create hollow nanoparticles [3] or nanotubes [4] [5]. Typically, a metal nanostructure is exposed to oxygen under elevated temperatures, where a hollow nanostructure based on a binary metal-oxide composition is achieved [6]. The outward diffusion of the metal is much faster than the inward diffusion of oxygen and therefore the created vacancies at the interface coalesce into a void which results in a hollow nanostructure [7]. We observe a similar Kirkendall effect by heating the core-shell nanowires ex situ without constant argon flow. Instead of a pure ALD nanotube consisting of amorphous  $\text{Al}_2\text{O}_3$ , the resulting nanotube has a fuzzy copper oxide shell.

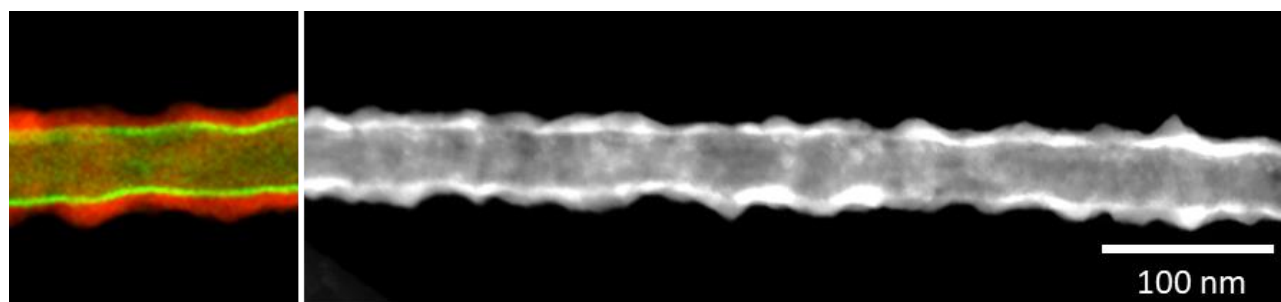

1. Nakamura R, Nakajima H (2011) Application of the Kirkendall Effect to Morphology Control of Nanowires: Morphology Change from Metal Nanowires to Oxide Nanotubes
2. Seitz F (1953) On the porosity observed in the Kirkendall effect. *Acta Metall* 1:355–369
3. Yang Z, Yang N, Pileni M-P (2015) Nano Kirkendall Effect Related to Nanocrystallinity of Metal Nanocrystals: Influence of the Outward and Inward Atomic Diffusion on the Final Nanoparticle Structure. *J Phys Chem C* 119:22249–22260. <https://doi.org/10.1021/acs.jpcc.5b06000>
4. Nakamura R, Matsubayashi G, Tsuchiya H, et al (2009) Formation of oxide nanotubes via oxidation of Fe, Cu and Ni nanowires and their structural stability: Difference in formation and shrinkage behavior of interior pores. *Acta Mater* 57:5046–5052
5. Jin fan H, Knez M, Scholz R, et al (2006) Monocrystalline spinel nanotube fabrication based on the Kirkendall effect. *Nat Mater* 5:627–631. <https://doi.org/10.1038/nmat1673>
6. Raidongia K, Rao CNR (2008) Study of the Transformations of Elemental Nanowires to Nanotubes of Metal Oxides and Chalcogenides through the Kirkendall Effect. *J Phys Chem C* 112:13366–13371. <https://doi.org/10.1021/jp8043658>
7. Wang W, Dahl M, Yin Y (2013) Hollow Nanocrystals through the Nanoscale Kirkendall Effect. *Chem Mater* 25:1179–1189. <https://doi.org/10.1021/cm3030928>

**ESI3:** SEM images of freestanding nanotubes emerging from a substrate.

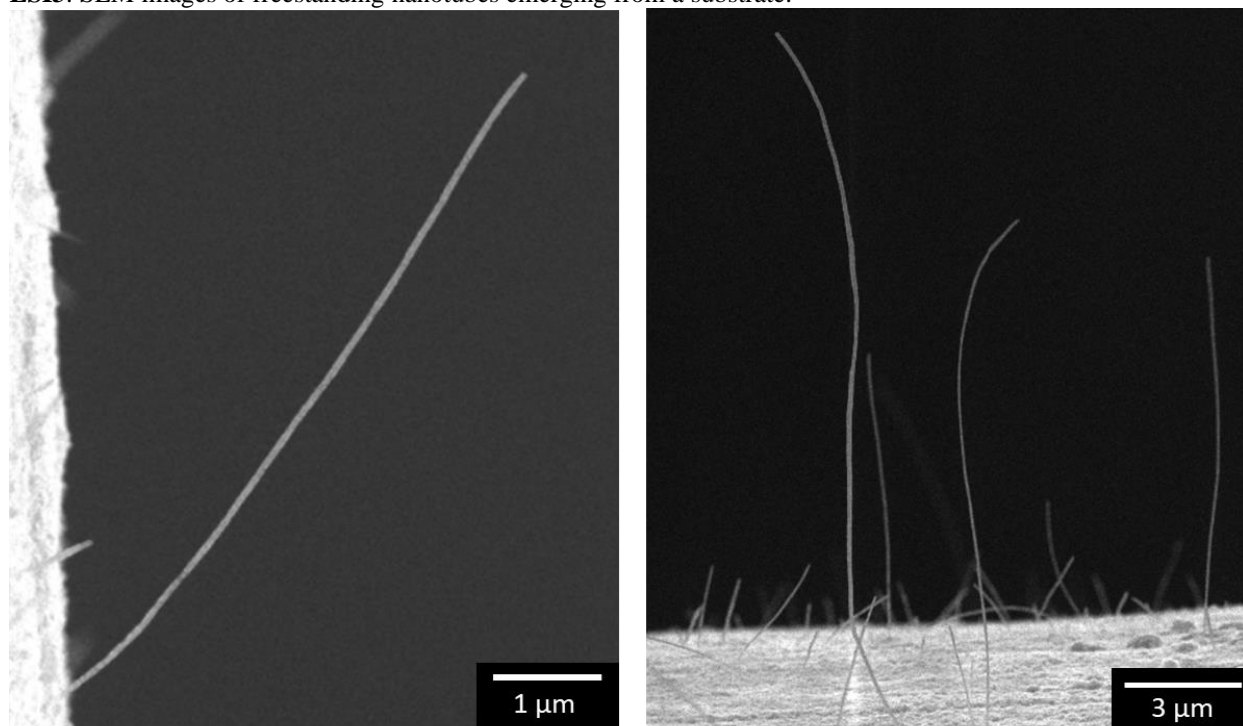

**ESI4:** Copper particles near nanotubes.

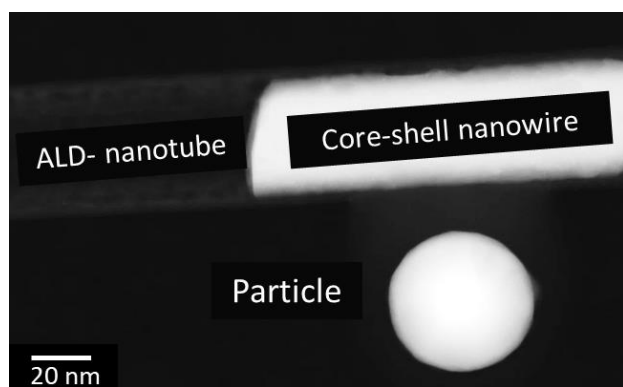

**ESI5:** *In situ* STEM video. Figure 3a in the main manuscript shows an exemplary image sequence of the experiment.

**ESI6:** *In situ* HRSTEM video: line-by-line desorption of copper atoms from the surface.

**ESI7:** *In situ* HRSTEM video of the dynamic process.

**ESI8:** Delamination at the metal-metal oxide interface observed at nanowires which have been directly transferred to the ALD chamber without breaking the vacuum.

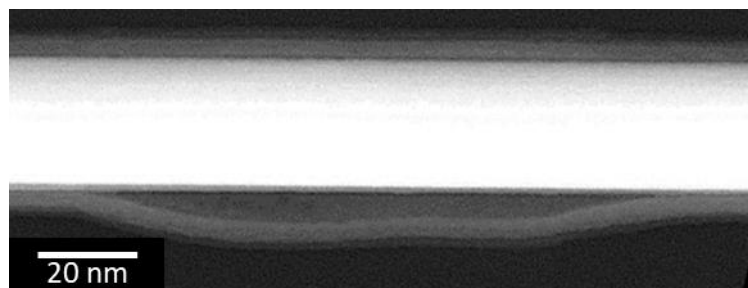

**ESI9:** Creation of complex multi-layered nanostructures. a) Working procedure. Cu NWs are coated with alternating layers of ALD- $\text{Al}_2\text{O}_3$  and ALD-ZnO. The resulting core-shell nanostructures are heated (following the heat treatment presented in the main manuscript) resulting in hollow nanolaminates. b) Exemplary STEM image of Cu NW coated with ALD-multilayers. c) EDX map (green: Al signal, violet: Zn signal) and corresponding STEM image of the hollow nanostructure.

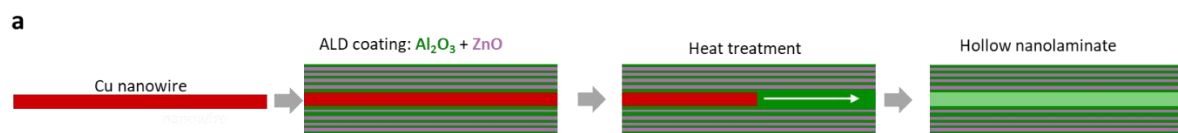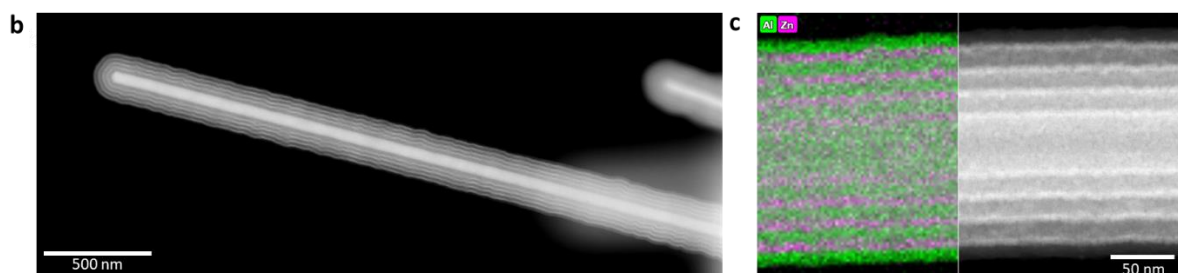

Supplement: d3nr01185b4.pdf [file d3nr01185b4.pdf]
